# Supplementary material for: Deciphering intersystem crossing and energy transfer mechanisms in a nonacoordinated ternary europium( iii ) complex: a combined spectroscopic and theoretical study
Source: Royal Society of Chemistry journal article supplement (doi:10.1039/d4ra06727d), 2024-01-01
Supplement: d4ra06727d1.pdf [file d4ra06727d1.pdf]

## Deciphering Intersystem Crossing and Energy Transfer Mechanisms in A Nonacoordinated Ternary Europium(III) Complex: A Combined Spectroscopic and Theoretical Study

Houda Al-Sharji,<sup>a</sup> Rashid Ilmi,<sup>\*a</sup> Willyan F. Oliveira,<sup>b</sup> Balqees S. Al-Saadi,<sup>a</sup> José D. L. Dutra,<sup>\*b</sup> Osama K Abou-Zied<sup>\*a</sup>, Paul R. Raithby<sup>\*c</sup> and Muhammad S Khan<sup>\*a</sup>

---

<sup>a</sup>Department of Chemistry, Sultan Qaboos University, P. O. Box 36, Al Khod 123, Oman

<sup>b</sup>Pople Computational Chemistry Laboratory, Department of Chemistry, UFS, 49100-000 São Cristóvão, Sergipe, Brazil

<sup>c</sup>Department of Chemistry, University of Bath, Claverton Down, Bath, BA2 7AY, UK

---

### E-mail addresses and ORCID ID of corresponding authors:

Rashid Ilmi (RI) : [rashidilmi@gmail.com](mailto:rashidilmi@gmail.com); 0000-0002-5165-5977

Osama K Abou-Zied (OKA) : [abouzied@squ.edu.om](mailto:abouzied@squ.edu.om); 0000-0003-0497-8412

Muhammad S. Khan (MSK) : [mks@squ.edu.om](mailto:mks@squ.edu.om); 0000-0001-5606-6832

José D. L. Dutra (JDLD) : [diogobios@academico.ufs.br](mailto:diogobios@academico.ufs.br); 0000-0003-2123-2209

Paul R. Raithby : [p.r.raithby@bath.ac.uk](mailto:p.r.raithby@bath.ac.uk); 0000-0002-2944-0662

---

## Electronic Supporting Information

### SI 1. Experimental Section: General instrumentation

The melting point of the **Ph-TerPyr** ligand was measured using the Stuart Scientific melting point SMP 10 apparatus. The Fourier transform infrared (FT-IR) spectra of pure solid samples were recorded on PerkinElmer Frontier FT-IR spectrometer in the range 400-4000  $\text{cm}^{-1}$ ; the solid samples were compressed as KBr disks using a Specac manual hydraulic press. Elemental analysis was performed on Euro EA-CHN Elemental Analyser in the Department of Chemistry, Sultan Qaboos University.  $^1\text{H}$  and  $^{13}\text{C}$  NMR spectra of Ph-TerPyr ligand were recorded on Bruker Biospin Avance III HD (700 MHz) FT-NMR spectrometer with  $\text{SiMe}_4$  as the internal reference at the Central Analytical and Applied Research Unit (CAARU) at Sultan Qaboos University. Mass spectra were obtained using an LCMS-8040, Shimadzu-Japan coupled to a triple quadrupole tandem mass spectrometer equipped with electrospray ionization (ESI). Thermal stability of the complexes was determined by thermogravimetric Analysis (TGA) and differential thermogravimetric analysis (DTA) using SDT Q600 (V20.9 Build 20) thermogravimetric analyzer and differential scanning calorimeter heated in the temperature range between 50-800  $^\circ\text{C}$  at a heating rate of 20  $^\circ\text{C}/\text{min}$  under dinitrogen ( $\text{N}_2$ ) atmosphere.

### SI 2. Single-crystal X-ray diffraction (SC-XRD)

A suitable crystal of **Eu-1** was selected and mounted on a MiTeGen microloop in fomblin oil on a Bruker APEX-II CCD diffractometer. The crystal was kept at 100 K during data collection. Using Olex2<sup>1</sup>, the structure was solved with the ShelXT<sup>2</sup> structure solution program using Intrinsic Phasing and refined with the XL<sup>3</sup> refinement package using Least Squares minimization. The crystal data, data collection and refinement parameters are presented in Tables S1 – S8, in the Supporting Information. Crystallographic data have been deposited with the Cambridge Crystallographic Data Centre as supplementary publication number CCDC 2370746. Copies of the data can be obtained free of charge via <https://www.ccdc.cam.ac.uk/conts/retrieving.html>, or from the Cambridge Crystallographic Data Centre, 12 Union Road, Cambridge CB2 1EZ, UK. Fax: +44 1223 336033: or e-mail: [deposit@ccdc.cam.ac.uk](mailto:deposit@ccdc.cam.ac.uk).

### SI 3. Equations applied to Calculate Photophysical Parameters

$$\Omega_{\lambda}^{\text{exp}} = \frac{3hA_{\text{Rad}} [{}^5D_0 \rightarrow {}^7F_J]}{32e^2\pi^3\chi v [{}^5D_0 \rightarrow {}^7F_J]^3 \left| \langle {}^5D_0 \| U^{(\lambda)} \| {}^7F_J \rangle \right|^2} \quad \text{Eq. S1}$$

$$A_{\text{Rad}} = \sum_{J=0}^4 A_{\text{Rad}} [{}^5D_0 \rightarrow {}^7F_J] \quad \text{Eq. S2}$$

$$A_{\text{Rad}} [{}^5D_0 \rightarrow {}^7F_J] = \frac{v [{}^5D_0 \rightarrow {}^7F_1]}{v [{}^5D_0 \rightarrow {}^7F_J]} \times \frac{A [{}^5D_0 \rightarrow {}^7F_1]}{A [{}^5D_0 \rightarrow {}^7F_1]} A_{\text{Rad}} [{}^5D_0 \rightarrow {}^7F_1] \quad \text{Eq. S3}$$

$$A_{\text{tot}} = \frac{1}{\tau_{\text{obs}}} = A_{\text{Rad}} + A_{\text{NRad}} \quad \text{Eq. S4}$$

$$\tau_R = 1/A_{Rad} \quad \text{Eq. S5}$$

$$Q_{Eu}^{Eu} = \frac{\tau_{obs}}{\tau_{Rad}} = \frac{A_{Rad}}{A_{Rad} + A_{NRad}} \quad \text{Eq. S6}$$

$$\eta_{sen} = \frac{Q_{Eu}^L}{Q_{Eu}^{Eu}} \quad \text{Eq. S7}$$

The relative quantum yield of **Eu-1** ( $Q_{Eu}^L$ ) was determined relative to [Eu(btfa)<sub>3</sub>(H<sub>2</sub>O)<sub>2</sub>] ( $Q_r$  = 1.9%) where btfa is the anion of 4,4,4-trifluoro-1-phenyl-1,3-butanedione.  $Q_s$  was calculated using the following Eq S8.

$$Q_{Eu}^L = \frac{A_r \times I_s \times \eta_s^2}{A_s \times I_r \times \eta_r^2} \times Q_r \quad \text{Eq. S8}$$

$A$ ,  $I$ , and  $\eta$  represent absorbance at the excitation wavelength, integrated intensity of the emission spectra, and refractive index, respectively. DCM has  $\eta$  value of 1.424.

#### SI 4. Pump-probe Ultrafast Transient Absorption Spectroscopy

The pump and probe pulses were obtained using a regenerative amplified Ti:Sapphire laser (Libra, Coherent). The Libra generates compressed laser pulses (70 fs pulse width) with an output power of 4.26 W at a repetition rate of 5 kHz and centered at 800 nm. The output beam was split into two parts. The major portion of the output pulse was used to pump a Coherent OPerA Solo (Light Conversion Ltd.) optical parametric amplifier to generate spectrally tunable light spanning the range 240–2600 nm and is used as the pump beam. The remaining small portion of the laser output was focused on a sapphire crystal to generate a white light continuum in the range 420-800 nm, which is used as the probe beam in a Helios transient absorption spectrometer (Ultrafast Systems, LLC). The probe light was measured by a fiber optic that is coupled to a multichannel spectrometer with a CMOS sensor in the range 350-850 nm. Chirp in the white light continuum probe was minimized by using parabolic mirrors. Rotational contribution to the overall excited state decay kinetics was removed by depolarizing the pump beam using a depolarizer (DPU-25, Thorlabs). The pump pulse was attenuated to ~100 nJ to avoid multiphoton excitation. The pump and probe pulses were focused on the sample and the temporal delay of the probe pulse was varied using a computer-controlled optical delay stage. Kinetic traces at appropriate wavelengths were assembled from the time-resolved spectral data. Surface Xplorer software (supplied by Ultrafast Systems) was used for data analysis. In order to adjust the zero delay for each wavelength and to get the chirp-corrected spectrum, we carried out the transformation process using the software program (Surface Xplore). The instrument response function (IRF) was measured from Raman scattering to be ~ 120 fs. The samples in solution for the lifetime measurements were prepared

in 2 mm fused silica cuvettes (Spectrocell Inc.) and were stirred during the experiment. All measurements were conducted at  $22.0 \pm 0.5$  °C.

### SI 5. Optimization of the Ground State Geometry and Singlet ( $^1\Pi\Pi^*$ ) and Triplet ( $^3\Pi\Pi^*$ ) State Energy Levels of the Complexes

Since the studied system exhibits crystallographic structure, this structure was employed to assess whether the DFT approach at the PBE1PBE/TZVP/MWB52 theory level, already applied in previous works published by us,<sup>4</sup> presents higher accuracy when compared to other methods. The Root-Mean-Square Deviation (RMSD) was used as metric, considering both all atoms in the structure and only those within the coordination polyhedron as references. Accordingly, the crystallographic structure was employed as the starting structure in all geometry optimization calculations, and the SVP and TZVPPD basis sets were also evaluated. SVP treats the electronic structure of the hydrogen atom using (4s1p)/[2s1p] and applies (7s4p1d)/[3s2p1d] for the atoms of the second period of the p-block. For TZVP, the (5s1p)/[3s1p] and (11s6p1d)/[5s3p1d] basis sets are used, and TZVPPD considers the (5s3p1d)/[3s3p1d] and (12s7p3d1f)/[6s3p3d1f] bases, respectively. The objective of applying these three basis sets was to evaluate the impact of increasing components in the basis functions on the structural modeling of the studied complex. For representing the electronic structure of the europium atom, the MWB(52)<sup>5</sup> effective core potential (ECP) was used, where 52 electrons are in the core, and the 11 remaining electrons are described by (7s6p5d)/[5s4p3d]. The calculations were performed using the ORCA program, version 5.0.3.<sup>6</sup> In addition to applying the DFT approach, the GFN-2 model<sup>7</sup> implemented in the xTB program,<sup>8</sup> together with the RM1 semiempirical model<sup>9</sup> using the MOPAC program 22.0.6,<sup>10</sup> were also applied. In all calculations, the charge and spin multiplicity of the complex were set to zero and singlet, respectively.

The PBE1PBE/TZVP/MWB52 geometry was used to calculate the ligand-centered singlet and triplet excited states, as it was the most consistent with the experimentally determined structure. To assess the performance of various density functionals in predicting absorption spectra, TD-DFT calculations were employed using a diverse set of over 50 density functionals implemented in the ORCA program.<sup>6</sup> The TZVP basis set in conjunction with the MWB52 ECP were applied, and the implicit solvent effect was also considered in the calculations. The energies of the singlet states, along with their corresponding oscillator strengths, were used to obtain the theoretical absorption spectrum through a Lorentzian fit with an arbitrary half-height bandwidth of 15 nm. The calculated absorption spectra were then compared with the experimental one. Among the various density functionals tested, the PBE1PBE/TZVP/MWB52 level of theory provided the TD-DFT result that exhibited the greatest agreement with the experimental absorption spectrum of the **Eu-1** complex.

## SI 6. Modelling of the Energy transfer (ET) Mechanism

The TD-DFT results obtained via PBE1PBE/TZVP/MWB52 method were utilized to calculate ligand-metal energy transfer (ET) rates according to Malta's model by following the protocol<sup>11</sup> reported by our research group,<sup>4</sup> and implemented in the LUMPAC software package.<sup>12</sup> The model is based on Fermi's golden rule<sup>13</sup> and Hamiltonian operator that include contributions from the Coulomb interaction (CI, Eq. S9) and exchange (Ex, Eq. S11) mechanisms.

$$W_{ET}^{CI} = \frac{2\pi}{\hbar} \frac{e^2 S_L F}{G(2J+1)} \sum_{\lambda=2,4,6} \Lambda_{\lambda} \left\langle \psi' J' \left\| U^{(\lambda)} \right\| \psi J \right\rangle^2 \quad \text{Eq. S9}$$

$$\Lambda_{\lambda} = 2\Omega_{\lambda}^{FED} (1-\sigma_1)^2 \left( \frac{1}{R_L^6} \right) + \langle r^{\lambda} \rangle^2 \langle 3 \left\| C^{(\lambda)} \right\| 3 \rangle^2 (1-\sigma_{\lambda})^2 \left( \frac{\lambda+1}{(R_L^{\lambda+2})^2} \right) \quad \text{Eq. S10}$$

$$W_{ET}^{Ex} = \frac{8\pi}{3\hbar} \frac{e^2}{R_L^4} \frac{(1-\sigma_0)^2 F}{G(2J+1)} \langle \psi' J' \left\| S \right\| \psi J \rangle^2 \sum_m \left\langle \Psi_{N-1}\Pi \left| \sum_j r_j C_0^{(1)}(j) s_{-m}(j) \right| \Psi_{N-1}\Pi^* \right\rangle^2 \quad \text{Eq. S11}$$

$$F = \frac{1}{\hbar\gamma_L} \sqrt{\frac{\ln 2}{\pi}} e^{-\left(\frac{\Delta}{\hbar\gamma_L}\right)^2 \ln 2} \quad \text{Eq. S12}$$

$$R_L = \frac{\sum_i c_i^2 R_{L_i}}{\sum_i c_i^2} \quad \text{Eq. S13}$$

$$(1-\sigma_0) \approx 0.05 \left( \frac{R_{\min}}{R_L} \right)^{7/2} \quad \text{Eq. S14}$$

The TD-DFT results are useful for quantifying the  $F$  term, given by Eq. S12, and the distance between the energy donor and acceptor centers involved in the ligand-metal ET channel ( $R_L$ , Eq. S13). The  $\Delta$  term present in Eq. S12 is the energy difference between the donor and acceptor excited states involved in the ET process. This energy difference was calculated using the TD-DFT singlet and triplet excited states' energies of the ligands and the excited states energies of Eu(III) taken from the work of Carnall and coworkers.<sup>14</sup> The excited states of the Eu(III) ion considered were  ${}^7F_0$ ,  ${}^7F_1$ ,  ${}^5D_0$ ,  ${}^5D_1$ ,  ${}^5D_2$ ,  ${}^5D_3$ ,  ${}^5D_4$ ,  ${}^5L_6$ ,  ${}^5L_7$ ,  ${}^5G_2$ ,  ${}^5G_3$ ,  ${}^5G_5$ , and  ${}^5G_6$ . The ligand bandwidth at half-height ( $\gamma_L$ ) was assumed a typical value of  $3250 \text{ cm}^{-1}$ .

The  $R_L$  quantity given by Eq. S13 is determined as a function of the atomic orbital coefficients of the  $i^{\text{th}}$  atom ( $c_i$ ) contributing to the ligand state and the distance from a given  $i$  atom to the metal ( $R_{L,i}$ ). In addition,  $R_L$  is also used to estimate the shielding factor ( $1-\sigma_0$ ) by Eq. S14,

where  $R_{\min}$  is the smallest distance between the atoms of the coordination polyhedron and the Eu(III) ion.

The  $\langle \psi' J' \| U^{(\lambda)} \| \psi J \rangle$  and  $\langle \psi' J' \| S \| \psi J \rangle$  matrix elements provide  $|\Delta J| = 2, 4, 6$  and  $|\Delta J| = 0, 1$  ( $J = J' = 0$  excluded) as selection rules for the CI and Ex mechanisms, respectively. To include excitations from the lowest excited states  ${}^7F_0$  and  ${}^7F_1$  to higher excited states of Eu(III), values of thermal populations equal to 0.64 ( ${}^7F_0$ ) and 0.33 ( ${}^7F_1$ ) were considered, assuming a temperature of 300 K.<sup>15</sup>

The  $\Omega_{\lambda}^{FED}$  term in Eq. 10 is exclusively due to the contribution of the forced electric dipole (FED) mechanism from the well-established J-O theory.  $\Omega_{\lambda}^{FED}$  is calculated using the  $(R_j, \theta_j, \phi_j)$  spherical coordinates of the atoms directly connected to Eu(III). The  $\Omega_{\lambda}^{calc}$  parameters were adjusted to reproduce the experimental values of the J-O intensity parameters of the complex by applying the QDC model<sup>16</sup> implemented into LUMPAC.

The backward ET rate from a given state of Eu(III) to a ligand-excited state was calculated by multiplying the respective forward ET rate by the Boltzmann factor,  $\exp\left(-\frac{|\Delta|}{k_B T}\right)$ , where  $k_B$  is the Boltzmann constant, and  $T$  is the room temperature. All other quantities appearing in Eq. 9 and Eq. S10 are listed in **Table S1** together with their brief description.

### SI 7. Radiative emission rate ( $A_R$ ) and PLQY

The theoretical photoluminescence quantum yield (PLQY) was calculated in terms of the energetic population of the emitting state of Eu(III) ( $\eta_{S_0}$ ) and of the absorber state of the ligand ( $S_0$ ) using the Eq. S15.

$$Q_{Eu}^L = \frac{A_R \eta_{S_0}}{\varphi \eta_{S_0}} \quad \text{Eq. S15}$$

$$A_R = \frac{32e^2 \pi^3 \chi}{3h(2J+1)} \sum_{\lambda=2,4,6} \nu[{}^5D_0 \rightarrow {}^7F_{J=\lambda}]^3 \Omega_{\lambda} \left| \langle {}^5D_0 \| U^{(\lambda)} \| {}^7F_{J=\lambda} \rangle \right|^2 + \frac{32\pi^3 n^3 \nu[{}^5D_0 \rightarrow {}^7F_1]^3}{3h} S_{md} \quad \text{Eq. S16}$$

$$\frac{d\eta_i}{dt} = -\sum_{i \neq j} W_{ji} \eta_j + \sum_{i \neq j} W_{ij} \eta_i = 0 \quad \text{Eq. S17}$$

where  $A_R$  is the theoretical radiative emission rate (Eq. S16) and is calculated as a function of the Judd-Ofelt intensity parameters determined by the QDC model. The Lorentz local-field correction was estimated with the expression  $\chi = n(n^2 + 2)^2 / 9$ , where  $n$  is the refractive index. The ligand-metal ET rates calculated with LUMPAC, and the ligands decay rates determined

using transient ultrafast spectroscopy, were applied to a postulated energy levels system to calculate the energy population of each  $i^{\text{th}}$  state considered in the ET modeling ( $\eta_i$ ). The system of rate equations describing the energy population variation of the involved states was solved under steady-state conditions (Eq. S17). Absorption rate from the fundamental singlet to a given excited singlet of the ligand. A typical value of  $10^4 \text{ s}^{-1}$  was considered for the absorption rate from the fundamental singlet to a given excited singlet of the ligand ( $\phi$ ).

The quantities in Eq. S15 – S17 used in the calculation of the emission quantum yield and the theoretical radiative emission rate with LUMPAC are shown in **Table SA**.

**Table SA:** Brief description of some important quantities used in the calculation of emission quantum yield and radiative emission rate with LUMPAC.

| Quantity                                                                                               | Description                                                                                                                                   | Value                                                                              |
|--------------------------------------------------------------------------------------------------------|-----------------------------------------------------------------------------------------------------------------------------------------------|------------------------------------------------------------------------------------|
| $\nu[{}^5D_0 \rightarrow {}^7F_J]$                                                                     | Energy of the barycentre of the ${}^5D_0 \rightarrow {}^7F_2$ , ${}^5D_0 \rightarrow {}^7F_4$ , and ${}^5D_0 \rightarrow {}^7F_6$ transitions | The values were taken from the work of Carnall and co-workers <sup>14</sup>        |
| $n$                                                                                                    | Refractive index of the medium                                                                                                                | To represent the DCM solvent, a value of 1.424 was assumed                         |
| $S_{md}$                                                                                               | Magnetic dipole strength of the ${}^5D_0 \rightarrow {}^7F_1$ transition <sup>17</sup>                                                        | $9.6 \times 10^{-42} \text{ esu}^2\text{cm}^2$                                     |
| $\left  \left\langle {}^5D_0 \left\  U^{(\lambda)} \right\  {}^7F_{J=\lambda} \right\rangle \right ^2$ | Unit operator matrix elements                                                                                                                 | The values were taken from the work of Carnall and co-workers <sup>14</sup>        |
| $W_{ij}$ and $W_{ji}$                                                                                  | Energy transfer rate from the $i$ to the $j$ state ( $W_{ij}$ ) and the backward rate ( $W_{ji}$ )                                            | The rates were calculated using the models of Malta or typical values were assumed |

### SI 8. Synthesis of ancillary ligand (Ph-TerPyr)

To a stirred mixture of benzaldehyde (2.73 g, 25.7 mmol) and 2-acetylpyridine (6.23 g, 51.4 mmol) in 200 ml of ethanol (EtOH), sodium hydroxide (NaOH, 2.06 g, 51.4 mmol) and 25% ammonia solution (10 mL) were added. The reaction mixture was stirred for 24 h at 25 °C. The precipitate was isolated by vacuum filtration and washed with a plentiful amount of cold EtOH. Recrystallization from dichloromethane ( $\text{CH}_2\text{Cl}_2$ , DCM):EtOH (1:1) mixture afforded colourless crystals of Ph-TerPyr (35.5% yield). Microanalysis calculated for  $\text{C}_{21}\text{H}_{15}\text{N}_3$ , C, 81.53; H, 4.89; N, 13.58%; found C, 81.70; H, 4.69; N, 13.20%. FT-IR (KBr pellet;  $\text{cm}^{-1}$ , Figure S1):  $\nu(\text{ar C-H st})$  3048, 3010  $\text{cm}^{-1}$ ;  $\nu(\text{C=N st})$  1583  $\text{cm}^{-1}$ ;  $\nu(\text{C=C st})$  1465  $\text{cm}^{-1}$ . ESI-MS<sup>+</sup> ( $m/z$ ) = 332.20 for  $[\text{M}+\text{Na}]^+$  (Figure S2). Melting point ( $T_m$ ) = 207-209 °C.

**Table S1:** Key quantities for energy transfer rates calculation with the models of Malta implemented in LUMPAC.

| Quantity                                                                                | Description                                                                   | Value                                                                                                                                       |
|-----------------------------------------------------------------------------------------|-------------------------------------------------------------------------------|---------------------------------------------------------------------------------------------------------------------------------------------|
| $J$                                                                                     | Total angular momentum quantum                                                | Depends on the excited state of the Eu(III) ion considered in the process of ET                                                             |
| $G$                                                                                     | Degeneracy of the ligand initial state                                        | 1 for singlet state ( $^1\Pi\Pi^*$ )<br>3 for triplet state ( $^3\Pi\Pi^*$ )                                                                |
| $\langle 3 \  C^{(\lambda)} \  3 \rangle$                                               | Racah tensor operators                                                        | $\langle 3 \  C^{(2)} \  3 \rangle = -1.366$<br>$\langle 3 \  C^{(4)} \  3 \rangle = 1.128$<br>$\langle 3 \  C^{(6)} \  3 \rangle = -1.270$ |
| $\langle r^\lambda \rangle$                                                             | Radial integrals for Eu(III) <sup>18</sup>                                    | $\langle r^2 \rangle = 0.9175$<br>$\langle r^4 \rangle = 2.0200$<br>$\langle r^6 \rangle = 9.0390$                                          |
| $(1 - \sigma_\lambda)$                                                                  | Shielding field owing to the 5s and 5p filled orbitals <sup>19</sup>          | $\sigma_2 = 0.600$<br>$\sigma_4 = 0.139$<br>$\sigma_6 = 0.900$                                                                              |
| $S_L$                                                                                   | Ligand dipole strength <sup>19</sup>                                          | $10^{-35}$ (e.s.u.) <sup>2</sup><br>(singlet donor state)<br>$10^{-40}$ (e.s.u.) <sup>2</sup><br>(triplet donor state)                      |
| $\langle \Psi_{N-1\Pi}   \sum_j r_j C_0^{(1)}(j) s_{-m}(j)   \Psi_{N-1\Pi^*} \rangle^2$ | Squared matrix element of the coupled dipole and spin operators <sup>20</sup> | $10^{-36}$ (e.s.u.) <sup>2</sup> cm <sup>2</sup>                                                                                            |
| $\langle \psi' J' \  U^{(\lambda)} \  \psi J \rangle$                                   | Unit operator matrix elements                                                 | The values taken from the work of Carnall and coworkers <sup>14</sup>                                                                       |
| $\langle \psi' J' \  S \  \psi J \rangle$                                               | Spin operator matrix elements                                                 | The values taken from the work of Kasprzycka and coworkers <sup>15</sup>                                                                    |



**Table S2:** Crystal data and structure refinement for **Eu-1**.

|                                              |                                                                                 |
|----------------------------------------------|---------------------------------------------------------------------------------|
| Empirical formula                            | C <sub>36</sub> H <sub>18</sub> EuF <sub>18</sub> N <sub>3</sub> O <sub>6</sub> |
| Formula weight                               | 1082.49                                                                         |
| Temperature (K)                              | 100                                                                             |
| Crystal system                               | orthorhombic                                                                    |
| Space group                                  | <i>Pca</i> 2 <sub>1</sub>                                                       |
| a (Å)                                        | 17.648(3)                                                                       |
| b (Å)                                        | 30.273(5)                                                                       |
| c (Å)                                        | 22.438(4)                                                                       |
| α (°)                                        | 90                                                                              |
| β (°)                                        | 90                                                                              |
| γ (°)                                        | 90                                                                              |
| Volume (Å <sup>3</sup> )                     | 11988(3)                                                                        |
| Z                                            | 12                                                                              |
| ρ <sub>calc</sub> (g/cm <sup>3</sup> )       | 1.799                                                                           |
| μ (mm <sup>-1</sup> )                        | 1.702                                                                           |
| F(000)                                       | 6336.0                                                                          |
| Crystal size (mm <sup>3</sup> )              | 0.55 × 0.31 × 0.175                                                             |
| Radiation                                    | MoKα (λ = 0.71073)                                                              |
| 2θ range for data collection (°)             | 1.346 to 57.402                                                                 |
| Index ranges                                 | -21 ≤ h ≤ 23, -35 ≤ k ≤ 40, -30 ≤ l ≤ 30                                        |
| Reflections collected                        | 174199                                                                          |
| Independent reflections                      | 30923 [R <sub>int</sub> = 0.0407, R <sub>sigma</sub> = 0.0303]                  |
| Data/restraints/parameters                   | 30923/1907/1755                                                                 |
| Goodness-of-fit on F <sup>2</sup>            | 1.079                                                                           |
| Final R indexes [I >= 2σ (I)]                | R <sub>1</sub> = 0.0954, wR <sub>2</sub> = 0.2334                               |
| Final R indexes [all data]                   | R <sub>1</sub> = 0.1048, wR <sub>2</sub> = 0.2444                               |
| Largest diff. peak/hole (e Å <sup>-3</sup> ) | 10.83/-2.82                                                                     |
| Flack parameter                              | 0.49(2)                                                                         |

**Table S3:** Selected bond angles (°) of **Eu-1 (A)**, **Eu-1 (B)**, and **Eu-1 (C)**.

| Bond                | Eu-1 (A)  | Eu-1 (B) | Eu-1 (C) | Bond                | Eu-1 (A)  | Eu-1 (B) | Eu-1 (C) |
|---------------------|-----------|----------|----------|---------------------|-----------|----------|----------|
|                     | Angle (°) |          |          |                     | Angle (°) |          |          |
| <b>O(1)-Eu-O(2)</b> | 69.7(4)   | 68.8(4)  | 68.4(4)  | <b>O(4)-Eu-O(2)</b> | 71.8(4)   | 69.6(5)  | 70.3(4)  |
| <b>O(1)-Eu-O(3)</b> | 76.5(4)   | 77.4(4)  | 72.8(4)  | <b>O(4)-Eu-O(3)</b> | 73.1(4)   | 77.9(5)  | 73.1(5)  |
| <b>O(1)-Eu-O(4)</b> | 135.5(4)  | 136.6(4) | 131.7(4) | <b>O(4)-Eu-O(5)</b> | 69.5(4)   | 73.5(5)  | 71.2(4)  |
| <b>O(1)-Eu-O(5)</b> | 128.5(4)  | 126.5(5) | 124.1(4) | <b>O(4)-Eu-O(6)</b> | 82.0(4)   | 74.9(5)  | 79.6(5)  |
| <b>O(1)-Eu-O(6)</b> | 140.4(4)  | 145.0(4) | 147.1(4) | <b>O(4)-Eu-N(1)</b> | 136.7(4)  | 144.5(5) | 141.5(5) |
| <b>O(1)-Eu-N(1)</b> | 68.4(4)   | 69.8(5)  | 67.2(4)  | <b>O(4)-Eu-N(2)</b> | 148.3(4)  | 138.1(5) | 145.0(4) |
| <b>O(1)-Eu-N(2)</b> | 68.4(4)   | 70.6(4)  | 73.3(4)  | <b>O(4)-Eu-N(3)</b> | 90.7(4)   | 79.8(5)  | 85.4(5)  |
| <b>O(1)-Eu-N(3)</b> | 95.6(4)   | 96.1(5)  | 101.4(4) | <b>O(5)-Eu-N(1)</b> | 68.8(4)   | 71.0(5)  | 71.2(4)  |
| <b>O(2)-Eu-O(5)</b> | 134.5(4)  | 128.6(5) | 132.5(4) | <b>O(5)-Eu-N(2)</b> | 115.1(4)  | 120.0(4) | 118.8(4) |
| <b>O(2)-Eu-N(1)</b> | 136.3(4)  | 137.0(5) | 135.1(4) | <b>O(5)-Eu-N(3)</b> | 133.4(4)  | 136.8(6) | 133.8(4) |
| <b>O(2)-Eu-N(2)</b> | 110.4(4)  | 111.3(5) | 108.7(4) | <b>O(6)-Eu-O(2)</b> | 127.6(4)  | 130.2(5) | 127.6(4) |
| <b>O(2)-Eu-N(3)</b> | 69.0(4)   | 68.6(6)  | 68.5(4)  | <b>O(6)-Eu-O(5)</b> | 68.8(4)   | 68.9(5)  | 69.6(4)  |
| <b>O(3)-Eu-O(2)</b> | 75.4(4)   | 71.0(5)  | 74.4(4)  | <b>O(6)-Eu-N(1)</b> | 93.4(4)   | 91.2(5)  | 94.6(4)  |
| <b>O(3)-Eu-O(5)</b> | 71.3(4)   | 67.2(5)  | 68.7(4)  | <b>O(6)-Eu-N(2)</b> | 72.0(4)   | 74.7(4)  | 74.1(4)  |
| <b>O(3)-Eu-O(6)</b> | 138.2(4)  | 133.3(4) | 135.6(4) | <b>O(6)-Eu-N(3)</b> | 66.8(4)   | 71.7(6)  | 67.2(4)  |
| <b>O(3)-Eu-N(1)</b> | 83.2(4)   | 89.4(5)  | 86.1(4)  | <b>N(1)-Eu-N(3)</b> | 127.0(4)  | 127.3(5) | 127.6(4) |
| <b>O(3)-Eu-N(2)</b> | 138.7(4)  | 143.6(5) | 141.6(4) | <b>N(2)-Eu-N(1)</b> | 64.3(4)   | 63.8(5)  | 64.5(4)  |
| <b>O(3)-Eu-N(3)</b> | 144.0(4)  | 138.5(5) | 141.7(4) | <b>N(2)-Eu-N(3)</b> | 62.8(4)   | 63.6(5)  | 63.3(4)  |

**Table S4:** A comparative continues shape measures (CShMs) of the crystallographic coordination polyhedron for **Eu-1 (A)**, **Eu-1 (B)**, and **Eu-1 (C)** calculated with the SHAPE software.

| Shape                                        | Symmetry | Calculated results |              |              |
|----------------------------------------------|----------|--------------------|--------------|--------------|
|                                              |          | Eu-1 (A)           | Eu-1 (B)     | Eu-1 (C)     |
| Enneagon (EP-9)                              | $D_{9h}$ | 30.909             | 23.545       | 29.953       |
| Octagonal pyramid (OPY-9)                    | $C_{8v}$ | 19.237             | 17.445       | 19.085       |
| Heptagonal bipyramid (HBPY-9)                | $D_{7h}$ | 19.421             | 20.390       | 19.104       |
| Johnson triangular cupola J3 (JTC-9)         | $C_{3v}$ | 17.623             | 13.596       | 17.454       |
| Capped cube J8 (JCCU-9)                      | $C_{4v}$ | 10.613             | 12.406       | 11.304       |
| Spherical-relaxed capped cube (CCU-9)        | $C_{4v}$ | 11.795             | 12.951       | 12.418       |
| Capped square antiprism J10 (JCSAPR-9)       | $C_{4v}$ | 5.717              | 6.958        | 5.923        |
| Spherical capped square antiprism (CSAPR-9)  | $C_{4v}$ | 5.159              | 5.984        | 5.213        |
| Tricapped trigonal prism J51 (JTCTPR-9)      | $D_{3h}$ | 6.767              | <b>4.872</b> | 7.227        |
| Spherical tricapped trigonal prism (TCTPR-9) | $D_{3h}$ | 4.963              | 6.748        | 5.396        |
| Tridiminished icosahedron J63 (JTDIC-9)      | $C_{3v}$ | 15.498             | 14.785       | 15.266       |
| Hula-hoop (HH-9)                             | $C_{2v}$ | 11.838             | 12.964       | 12.193       |
| Muffin (MFF-9)                               | $C_s$    | <b>4.201</b>       | 6.365        | <b>4.714</b> |

**Table S5:** Dihedral angles ( $^{\circ}$ ) between the central pyridyl ring plane (B) and the peripheral pyridyl and phenyl rings planes.

| Ring Planes    | Dihedral angle ( $^{\circ}$ ) |          |          |
|----------------|-------------------------------|----------|----------|
|                | Eu-1 (A)                      | Eu-1 (B) | Eu-1 (C) |
| <b>B and A</b> | 16.00                         | 14.96    | 21.22    |
| <b>B and C</b> | 2.85                          | 10.85    | 5.84     |
| <b>B and D</b> | 27.61                         | 24.65    | 22.40    |

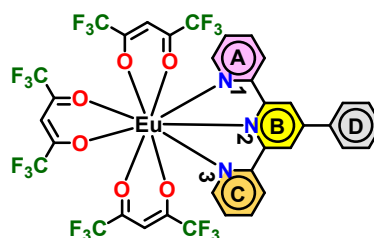

**Table S6:** Hydrogen bonding interactions in **Eu-1**. d: distances ( $\text{\AA}$ );  $\angle$ : angles ( $^{\circ}$ ); D: donor atom and A: acceptor atom.

| D-H $\cdots$ A                              | d(D-H) | d(H $\cdots$ A) | d(D $\cdots$ A) | $\angle$ (DHA) |
|---------------------------------------------|--------|-----------------|-----------------|----------------|
| C(19A)-H(19A) $\cdots$ F(13C) <sup>#1</sup> | 0.951  | 2.608           | 3.532           | 163.76         |
| C(12C)-H(12C) $\cdots$ F(16A) <sup>#2</sup> | 0.951  | 2.613           | 3.536           | 163.78         |
| C(21C)-H(21C) $\cdots$ F(16A) <sup>#2</sup> | 0.950  | 2.619           | 3.537           | 162.88         |
| C(21A)-H(21A) $\cdots$ F(16C) <sup>#2</sup> | 0.949  | 2.379           | 3.205           | 145.26         |
| C(34A)-H(34A) $\cdots$ F(5A) <sup>#2</sup>  | 0.949  | 2.418           | 3.343           | 164.53         |
| C(17B)-H(17B) $\cdots$ F(3A) <sup>#3</sup>  | 0.951  | 2.643           | 3.492           | 148.90         |
| C(3A)-H(3A) $\cdots$ F(1B) <sup>#3</sup>    | 0.949  | 2.574           | 3.101           | 115.31         |
| C(4A)-H(4A) $\cdots$ F(2B) <sup>#3</sup>    | 0.950  | 2.626           | 3.279           | 126.28         |
| C(3B)-H(3B) $\cdots$ F(4A) <sup>#4</sup>    | 0.949  | 2.523           | 3.320           | 141.55         |
| C(34C)-H(34C) $\cdots$ F(5C) <sup>#5</sup>  | 0.951  | 2.512           | 3.455           | 171.16         |
| C(9B)-H(9B) $\cdots$ F(2C) <sup>#6</sup>    | 0.950  | 2.614           | 3.553           | 169.95         |
| C(12B)-H(12B) $\cdots$ F(2C) <sup>#6</sup>  | 0.950  | 2.493           | 3.356           | 151.03         |
| C(7C)-H(7C) $\cdots$ F(17B) <sup>#6</sup>   | 0.950  | 2.551           | 3.263           | 131.86         |
| C(19B)-H(19B) $\cdots$ F(17C) <sup>#7</sup> | 0.951  | 2.663           | 3.165           | 113.52         |
| C(24C)-H(24C) $\cdots$ F(3C) <sup>#3</sup>  | 0.950  | 2.396           | 2.744           | 101.29         |
| C(24C)-H(24C) $\cdots$ F(4C) <sup>#3</sup>  | 0.950  | 2.650           | 2.885           | 94.53          |
| C(29C)-H(29C) $\cdots$ F(8C) <sup>#3</sup>  | 0.949  | 2.451           | 2.776           | 99.81          |
| C(29C)-H(29C) $\cdots$ F(12C) <sup>#3</sup> | 0.949  | 2.336           | 2.696           | 101.83         |
| C(34C)-H(34C) $\cdots$ F(14C) <sup>#3</sup> | 0.951  | 2.518           | 2.797           | 96.93          |
| C(34C)-H(34C) $\cdots$ F(17C) <sup>#3</sup> | 0.951  | 2.396           | 2.717           | 99.28          |
| C(15C)-H(15C) $\cdots$ O(2C) <sup>#3</sup>  | 0.949  | 2.640           | 2.960           | 100.21         |
| C(15C)-H(15C) $\cdots$ O(4C) <sup>#3</sup>  | 0.949  | 2.626           | 3.285           | 126.91         |
| C(1C)-H(1C) $\cdots$ O(5C) <sup>#3</sup>    | 0.951  | 2.429           | 2.981           | 116.76         |
| C(24A)-H(24A) $\cdots$ F(2A) <sup>#3</sup>  | 0.950  | 2.326           | 2.694           | 102.36         |
| C(24A)-H(24A) $\cdots$ F(5A) <sup>#3</sup>  | 0.950  | 2.521           | 2.794           | 96.60          |
| C(29A)-H(29A) $\cdots$ F(8A) <sup>#3</sup>  | 0.950  | 2.391           | 2.751           | 102.04         |
| C(29A)-H(29A) $\cdots$ F(12A) <sup>#3</sup> | 0.950  | 2.346           | 2.721           | 102.97         |
| C(34A)-H(34A) $\cdots$ F(18A) <sup>#3</sup> | 0.949  | 2.310           | 2.694           | 103.46         |
| C(15A)-H(15A) $\cdots$ O(2A) <sup>#3</sup>  | 0.949  | 2.580           | 2.973           | 105.24         |
| C(1A)-H(1A) $\cdots$ O(5A) <sup>#3</sup>    | 0.951  | 2.478           | 2.958           | 111.23         |
| C(24B)-H(24B) $\cdots$ F(3B) <sup>#3</sup>  | 0.950  | 2.387           | 2.723           | 100.32         |
| C(24B)-H(24B) $\cdots$ F(4B) <sup>#3</sup>  | 0.950  | 2.508           | 2.791           | 97.21          |
| C(29B)-H(29B) $\cdots$ F(8B) <sup>#3</sup>  | 0.950  | 2.430           | 2.770           | 100.78         |
| C(29B)-H(29B) $\cdots$ F(12B) <sup>#3</sup> | 0.950  | 2.401           | 2.732           | 100.06         |
| C(34B)-H(34B) $\cdots$ F(14B) <sup>#3</sup> | 0.951  | 2.514           | 2.791           | 96.78          |

|                                    |       |       |       |        |
|------------------------------------|-------|-------|-------|--------|
| C(34B)-H(34B)⋯F(18B) <sup>#3</sup> | 0.951 | 2.236 | 2.601 | 101.69 |
| C(15B)-H(15B)⋯O(2B) <sup>#3</sup>  | 0.950 | 2.667 | 2.943 | 97.33  |
| C(15B)-H(15B)⋯O(4B) <sup>#3</sup>  | 0.950 | 2.432 | 3.099 | 127.13 |
| C(1B)-H(1B)⋯O(5B) <sup>#3</sup>    | 0.950 | 2.521 | 3.006 | 111.78 |

Symmetry transformations: (#1) x,y,z; 1-x,-y,-1/2+z (#2) x,y,z; 1.5-x,y,-1/2+z (#3) x,y,z; x,y,z (#4) x,y,z; 1/2+x,1-y,z (#5) 1-x,-y,-1/2+z; -1/2+x,-y,-1+z (#6) 1-x,-y,-1/2+z; 1-x,-y,-1/2+z (#7) 1-x,-y,-1/2+z; -1/2+x,-y,z

**Table S7:** Root Mean Square Deviation (RMSD) for geometries optimized with different approaches, taking the experimental structure as a reference, calculated both for all atoms in the structure and just the atoms in the coordination polyhedron.

| Method                   | RMSD (Å)      |                         |
|--------------------------|---------------|-------------------------|
|                          | All atoms     | Coordination polyhedron |
| PBE1PBE/SVP/MWB52        | 0.5361        | 0.1051                  |
| PBE1PBE/TZVP/MWB52       | <b>0.5372</b> | <b>0.0960</b>           |
| PBE1PBE/TZVP/MWB52 (DCM) | 0.5484        | 0.1106                  |
| PBE1PBE/TZVPPD/MWB52     | 0.6344        | 0.1002                  |
| GFN-2                    | 0.6548        | 0.1572                  |
| RM1                      | 0.5905        | 0.1373                  |

**Table S8:** Spherical coordinates of the atoms of the coordination polyhedron of **Eu-1** calculated at the PBE1PBE/TZVP/MWB52 DFT level of theory.

| Atom            | R (Å)  | $\theta$ (°) | $\phi$ (°) |
|-----------------|--------|--------------|------------|
| O2 (hfaa 1)     | 2.4567 | 17.02        | 209.95     |
| O3 (hfaa 1)     | 2.4819 | 51.12        | 21.82      |
| O4 (hfaa 2)     | 2.4073 | 76.48        | 102.38     |
| O5 (hfaa 2)     | 2.4156 | 119.04       | 40.24      |
| O6 (hfaa 3)     | 2.4884 | 138.95       | 137.93     |
| O7 (hfaa 3)     | 2.4545 | 147.85       | 277.22     |
| N8 (Ph-TerPyr)  | 2.5891 | 84.41        | 188.42     |
| N9 (Ph-TerPyr)  | 2.6236 | 81.42        | 251.45     |
| N10 (Ph-TerPyr) | 2.5887 | 87.05        | 314.66     |

**Table S9:** Energy, electronic transitions, distance from energy donor to acceptor center ( $R_L$ ) of the  $S_1$ ,  $T_1$  and  $T_4$  states predicted using the PBE1PBE/TZVP/MWB52 (DCM) TD-DFT results with the help of LUMPAC.

| State | Energy (cm <sup>-1</sup> ) | $R_L$ (Å) | Major Contribution                                                                                | Total  |
|-------|----------------------------|-----------|---------------------------------------------------------------------------------------------------|--------|
| $S_1$ | 32554.6                    | 3.9822    | HOMO-2→LUMO (50.31%)<br>HOMO-7→LUMO+2 (11.33%)<br>HOMO-7→LUMO+3 (5.33%)                           | 66.96% |
| $T_1$ | 22233.7                    | 3.7787    | HOMO-4→LUMO+1 (36.42%)<br>HOMO-3→LUMO+1 (26.76%)<br>HOMO→LUMO+1 (14.18%)<br>HOMO-4→LUMO+2 (5.57%) | 82.93% |
| $T_4$ | 26160.9                    | 4.2959    | HOMO-2→LUMO+4 (21.94%)<br>HOMO-2→LUMO+3 (19.55%)<br>HOMO-2→LUMO+2 (13.42%)                        | 60.53% |

HOMO-3→LUMO (5.62%)

**Table S10:** Theoretical intensity parameters calculated using the QDC model along with the ZDO electronic density ( $q$ ), electrophilic superdelocalizability ( $SE$ ), charge factor ( $g$ ) and polarizability ( $\alpha$ ) of the atoms of the coordination polyhedron of **Eu-1**.

| Ligand atom                                                                                                                                                                                    | QDC parameters                                                                                                |           |        |                             |
|------------------------------------------------------------------------------------------------------------------------------------------------------------------------------------------------|---------------------------------------------------------------------------------------------------------------|-----------|--------|-----------------------------|
|                                                                                                                                                                                                | $Q = 0.0313 \text{ au}^{-1}$ ; $D = 59.4598 \text{ au}^{-1} \cdot \text{\AA}^3$ ; $C = 21.6393 \text{ \AA}^3$ |           |        |                             |
|                                                                                                                                                                                                | $D/C = 2.75 \text{ au}^{-1}$                                                                                  |           |        |                             |
|                                                                                                                                                                                                | $q$ (au)                                                                                                      | $SE$ (au) | $g$    | $\alpha$ ( $\text{\AA}^3$ ) |
| O2 (hfaa 1)                                                                                                                                                                                    | 6.3384                                                                                                        | -0.2212   | 0.1987 | 8.4849                      |
| O3 (hfaa 1)                                                                                                                                                                                    | 6.3336                                                                                                        | -0.2996   | 0.1985 | 3.8267                      |
| O4 (hfaa 2)                                                                                                                                                                                    | 6.3304                                                                                                        | -0.2984   | 0.1984 | 3.8936                      |
| O5 (hfaa 2)                                                                                                                                                                                    | 6.3286                                                                                                        | -0.2709   | 0.1983 | 5.5346                      |
| O6 (hfaa 3)                                                                                                                                                                                    | 6.3315                                                                                                        | -0.3463   | 0.1984 | 1.0512                      |
| O7 (hfaa 3)                                                                                                                                                                                    | 6.3414                                                                                                        | -0.3441   | 0.1987 | 1.1815                      |
| N8 (Ph-TerPyr)                                                                                                                                                                                 | 5.2011                                                                                                        | -0.3272   | 0.1630 | 2.1868                      |
| N9 (Ph-TerPyr)                                                                                                                                                                                 | 5.1959                                                                                                        | -0.3365   | 0.1628 | 1.6296                      |
| N10 (Ph-TerPyr)                                                                                                                                                                                | 5.2060                                                                                                        | -0.2604   | 0.1632 | 6.1586                      |
| $\Omega_2^{\text{FED}} = 0.0011 \times 10^{-20} \text{ cm}^2$ ; $\Omega_4^{\text{FED}} = 0.0076 \times 10^{-20} \text{ cm}^2$<br>$\Omega_6^{\text{FED}} = 0.0146 \times 10^{-20} \text{ cm}^2$ |                                                                                                               |           |        |                             |
| $\Omega_2^{\text{DC}} = 23.1340 \times 10^{-20} \text{ cm}^2$ ; $\Omega_4^{\text{DC}} = 9.6786 \times 10^{-20} \text{ cm}^2$<br>$\Omega_6^{\text{DC}} = 0.1802 \times 10^{-20} \text{ cm}^2$   |                                                                                                               |           |        |                             |

(a)

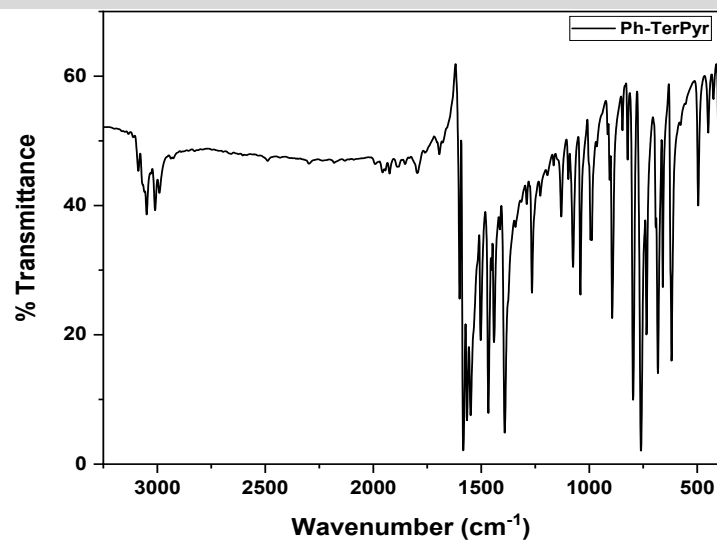

(b)

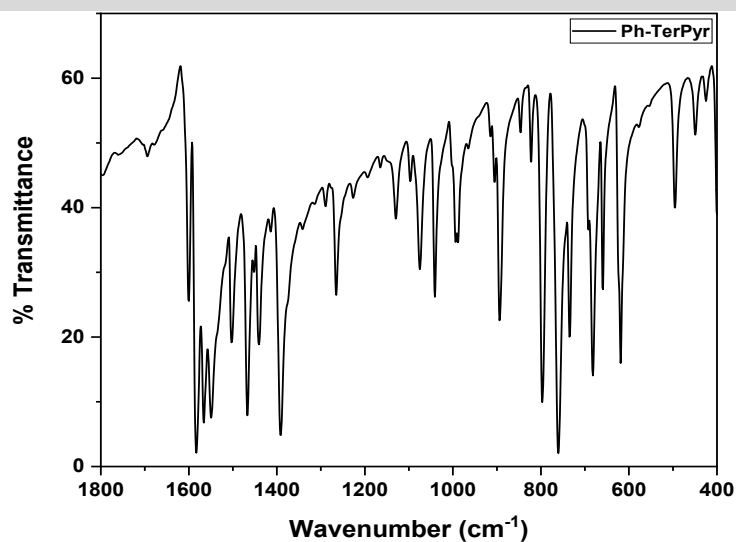

**Figure S1: (a)** FT-IR spectra of the Ph-TerPyr ligand and **(b)** expansion of the region between 1800 – 400 cm<sup>-1</sup>.

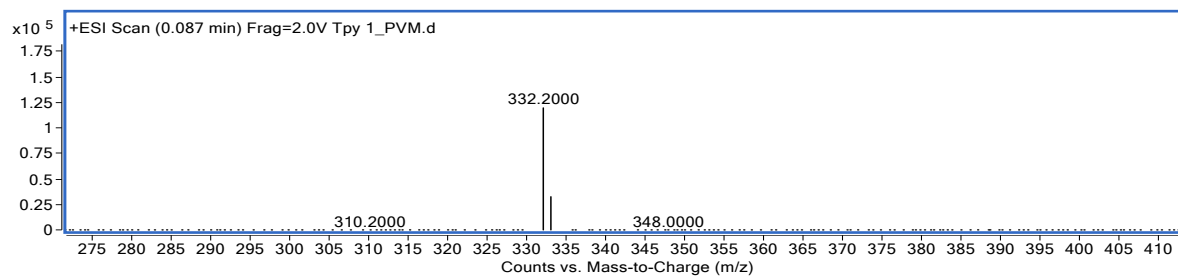

**Figure S2: +ESI-MS spectrum of the Ph-TerPyr ligand in DCM.**

(a)

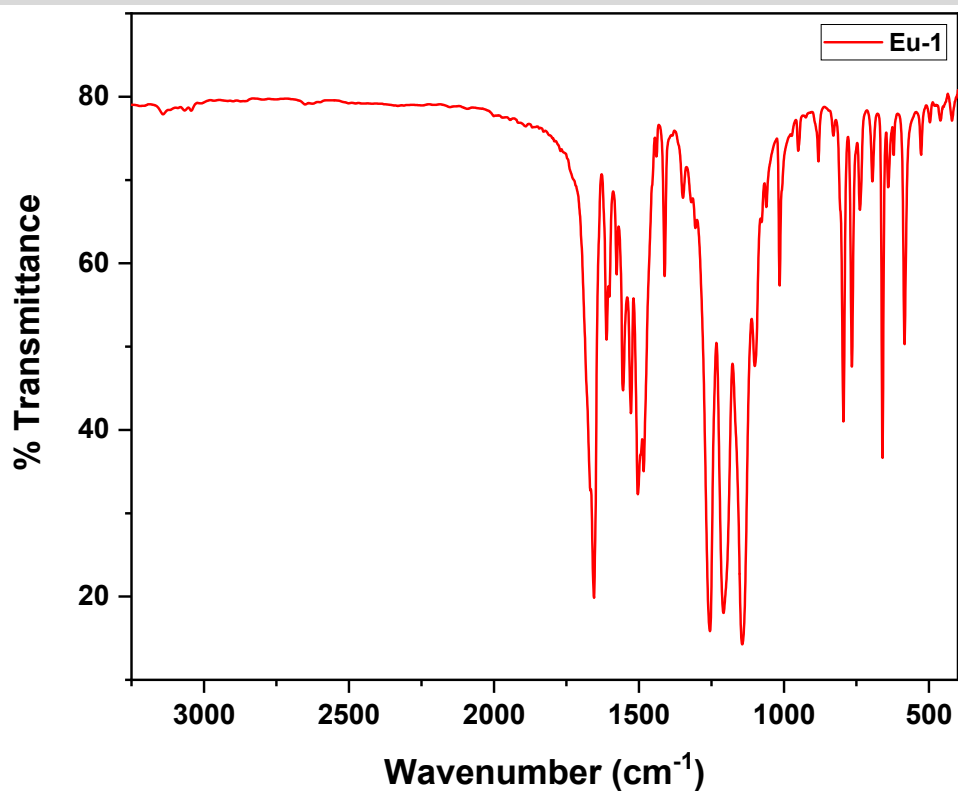

(b)

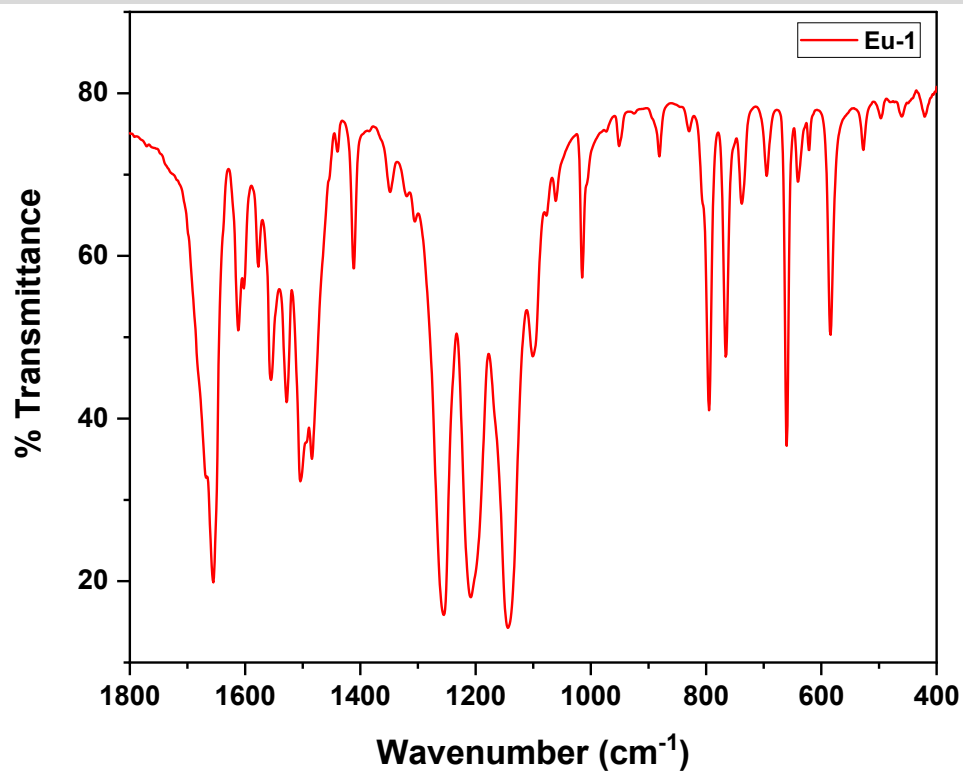

**Figure S3:** (a) FT-IR spectra of **Eu-1** and (b) expansion of the region between 1800 – 400 cm<sup>-1</sup>.

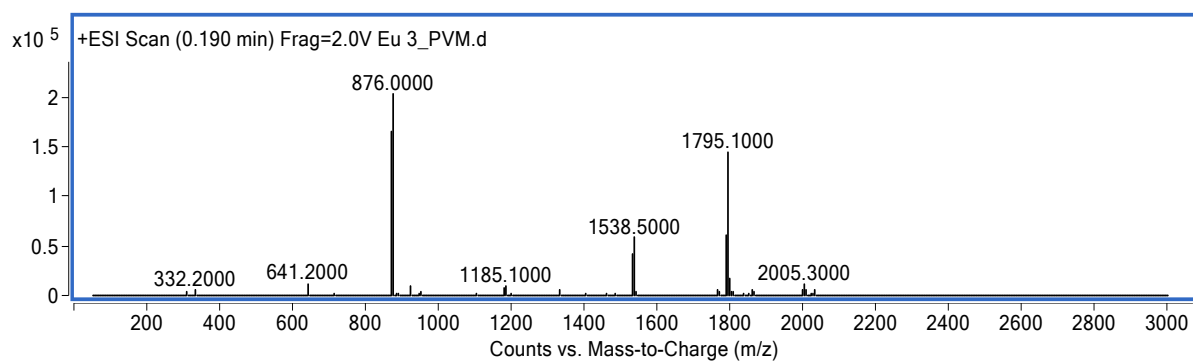

**Figure S4:** <sup>+</sup>ESI-MS spectrum of **Eu-1** complex in DCM.

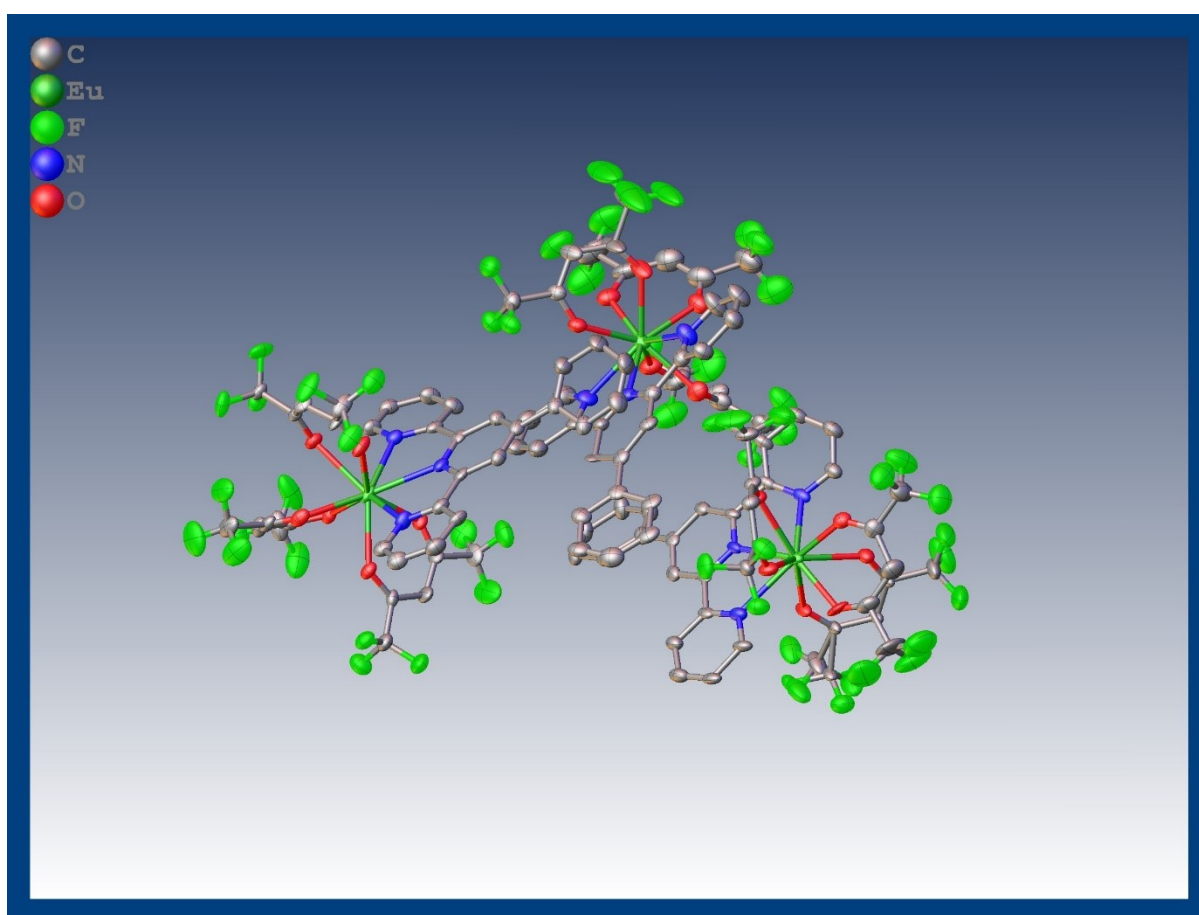

**Figure S5:** View of the asymmetric unit of **Eu-1**.



(a)

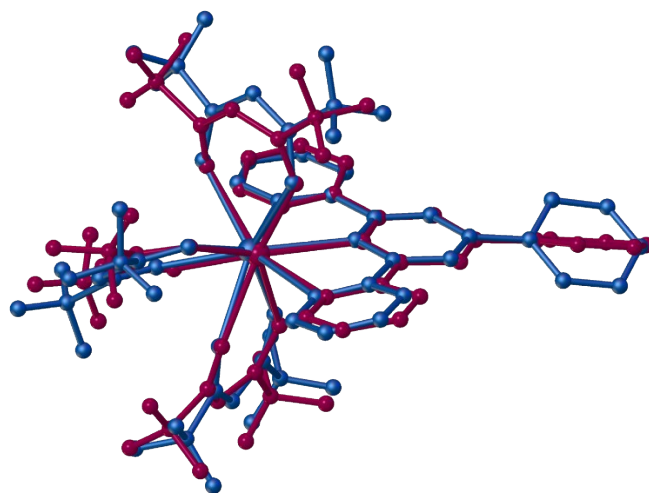

(b)

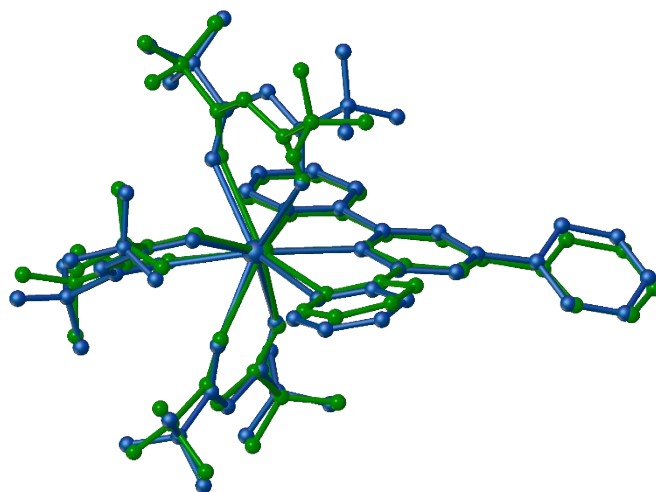

(c)

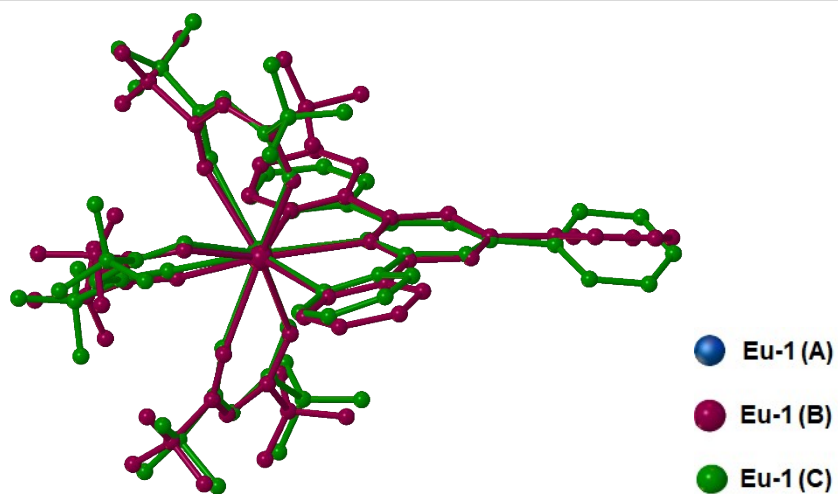

**Figure S6:** An overlap of (a) Eu-1 (A) and Eu-1 (B) (b) Eu-1 (A) and Eu-1 (C) and (c) Eu-1 (B) and Eu-1 (C).

(a)

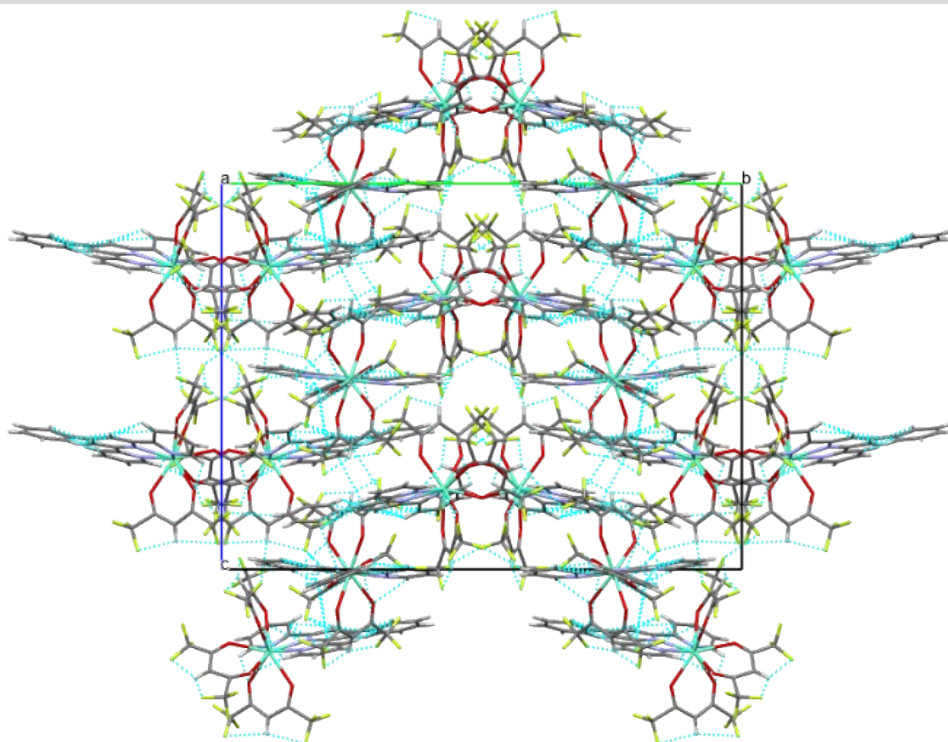

(b)

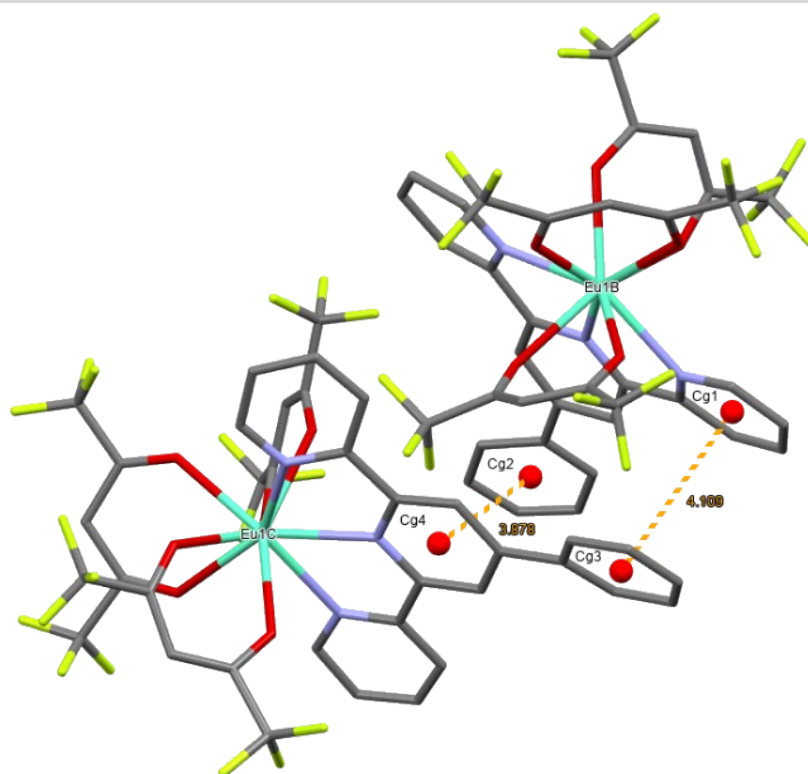

**Figure S7:** Crystal packing diagram of **Eu-1** illustrating (a) hydrogen bonding interactions (b)  $\pi$ - $\pi$  stacking interactions.

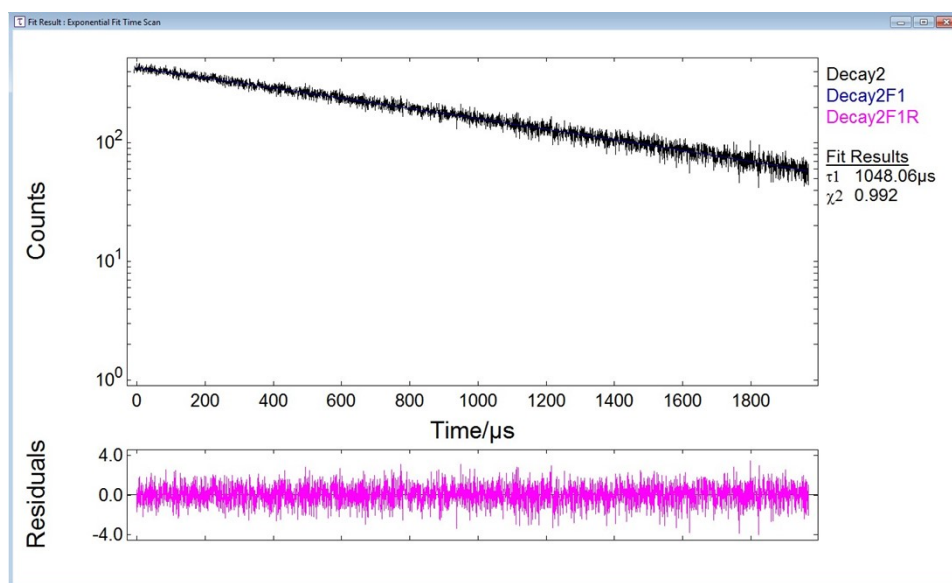

**Figure S8:** Room-temperature decay profile of **Eu-1** in DCM solution.

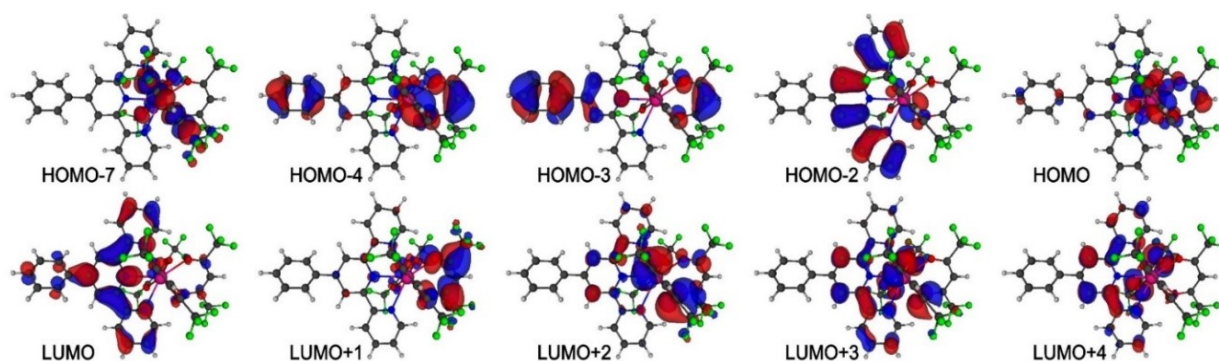

**Figure S9:** Selected molecular orbitals calculated with the PBE1PBE/TZVP/MWB52 TD-DFT method, accounting for the implicit effect of the DCM solvent.

## References

1. O. V. Dolomanov, L. J. Bourhis, R. J. Gildea, J. A. K. Howard and H. Puschmann, *J. Appl. Crystallogr.*, 2009, **42**, 339-341.
2. G. Sheldrick, *Acta Crystallogr., Sect. A*, 2015, **71**, 3-8.
3. G. Sheldrick, *Acta Crystallographica Section A*, 2008, **64**, 112-122.
4. (a) M. S. Khan, R. Ilmi, W. Sun, J. D. L. Dutra, W. F. Oliveira, L. Zhou, W.-Y. Wong and P. R. Raithby, *J. Mater. Chem. C*, 2020, **8**, 5600-5612; (b) R. Ilmi, W. Sun, J. D. L. Dutra, N. K. Al-Rasbi, L. Zhou, P.-C. Qian, W.-Y. Wong, P. R. Raithby and M. S. Khan, *J. Mater. Chem. C*, 2020, **8**, 9816-9827; (c) R. Ilmi, D. Zhang, J. D. L. Dutra, N. Dege, L. Zhou, W.-Y. Wong, P. R. Raithby and M. S. Khan, *Org. Electron.*, 2021, **96**, 106216; (d) I. J. Al-Busaidi, R. Ilmi, J. D. L. Dutra, W. F. Oliveira, A. Haque, N. K. Al Rasbi, F. Marken, P. R. Raithby and M. S. Khan, *Dalton Trans.*, 2021, **50**, 1465-1477; (e) R. Ilmi,

- J. Yin, J. D. L. Dutra, N. K. Al Rasbi, W. F. Oliveira, L. Zhou, W.-Y. Wong, P. R. Raithby and M. S. Khan, *Dalton T*, 2022, **51**, 14228-14242; (f) I. J. Al-Busaidi, R. Ilmi, D. Zhang, J. D. L. Dutra, W. F. Oliveira, N. K. Al Rasbi, L. Zhou, W.-Y. Wong, P. R. Raithby and M. S. Khan, *Dyes Pigm.*, 2022, **197**, 109879; (g) R. Ilmi, J. Wang, J. D. L. Dutra, L. Zhou, W.-Y. Wong, P. R. Raithby and M. S. Khan, *Chemistry – A European Journal*, 2023, **29**, e202300376; (h) R. Ilmi, X. Xia, J. D. L. Dutra, G. S. Santos, L. Zhou, W.-Y. Wong, P. R. Raithby and M. S. Khan, *ACS Applied Electronic Materials*, 2024, **6**, 2624-2638.
5. M. Dolg, H. Stoll, A. Savin and H. Preuss, *Theor. Chim. Acta*, 1989, **75**, 173-194.
  6. F. Neese, *WIREs Comput. Mol. Sci.*, 2022, **12**, e1606.
  7. C. Bannwarth, S. Ehlert and S. Grimme, *J Chem Theory Comput*, 2019, **15**, 1652-1671.
  8. C. Bannwarth, E. Caldeweyher, S. Ehlert, A. Hansen, P. Pracht, J. Seibert, S. Spicher and S. Grimme, *WIREs Computational Molecular Science*, 2021, **11**, e1493.
  9. M. A. Filho, J. D. L. Dutra, H. L. Cavalcanti, G. B. Rocha, A. M. Simas and R. O. Freire, *Journal of Chemical Theory and Computation*, 2014, **10**, 3031-3037.
  10. J. J. P. Stewart, A. Klamt, W. Thiel, D. Danovich, G. B. Rocha, R. L. Giesecking, J. E. Moussa, H. A. Kurtz, P. Korambath, K. M. Merz and B. Wang, in *Zenodo*, Zenodo, Zenodo, 22.0.6 edn., 2022.
  11. (a) O. L. Malta, *J. Lumin.*, 1997, **71**, 229-236; (b) F. R. G. E. Silva and O. L. Malta, *J. Alloys Compd.*, 1997, **250**, 427-430.
  12. J. D. Dutra, T. D. Bispo and R. O. Freire, *J. Comput. Chem.*, 2014, **35**, 772-775.
  13. A. N. Carneiro Neto, E. E. S. Teotonio, G. F. de Sá, H. F. Brito, J. Legendziewicz, L. D. Carlos, M. C. F. C. Felinto, P. Gawryszewska, R. T. Moura, R. L. Longo, W. M. Faustino and O. L. Malta, in *Handbook on the Physics and Chemistry of Rare Earths*, eds. J.-C. G. Bünzli and V. K. Pecharsky, Elsevier, 2019, vol. 56, pp. 55-162.
  14. W. T. Carnall, H. Crosswhite and H. M. Crosswhite, *Energy level structure and transition probabilities in the spectra of the trivalent lanthanides in LaF<sub>3</sub>*, United States, 1978.
  15. E. Kasprzycka, A. N. Carneiro Neto, V. A. Trush, L. Jerzykiewicz, V. M. Amirkhanov, O. L. Malta, J. Legendziewicz and P. Gawryszewska, *J. Rare Earths*, 2020, **38**, 552-563.
  16. J. D. L. Dutra, N. B. D. Lima, R. O. Freire and A. M. Simas, *Sci. Rep.*, 2015, **5**, 13695.
  17. M. J. Weber, T. E. Varitimo and B. H. Matsinge, *Physical Review B*, 1973, **8**, 47-53.
  18. A. J. Freeman and J. P. Desclaux, *J Magn Magn Mater*, 1979, **12**, 11-21.
  19. O. L. Malta and F. R. G. E. Silva, *Spectrochim Acta A*, 1998, **54**, 1593-1599.
  20. O. L. Malta, *J Non-Cryst Solids*, 2008, **354**, 4770-4776.
